# Supplementary material
Source: PubMed Central journal article supplement (PMC5240591)
Supplement: NIHMS840489-supplement-01.pdf [file NIHMS840489-supplement-01.pdf]

# Supporting Information

## Species-Specific Structural and Functional Divergence of $\alpha$ -crystallins: Zebrafish $\alpha$ Ba- and rodent $\alpha$ A<sup>ins</sup>-crystallin encode activated chaperones

*Hanane A. Koteiche<sup>1</sup>, Derek P. Claxton<sup>1</sup>, Sanjay Mishra, Ezelle T. McDonald and Hassane S. Mchaourab\**

Department of Molecular Physiology and Biophysics, Vanderbilt University School of Medicine, Nashville, TN 37232, United States

\*Corresponding author.

Department of Molecular Physiology and Biophysics  
741 Light Hall, 2215 Garland Ave, Nashville, TN 37232  
Telephone: (615) 322-3307  
Email: [hassane.mchaourab@vanderbilt.edu](mailto:hassane.mchaourab@vanderbilt.edu)

|    |                   |     |                                                      |
|----|-------------------|-----|------------------------------------------------------|
| H  | aA                | 1   | MDVTIQHPWFKRTLGPFFYPSRLFDQFFGEGLEFYDLLPFLSSTISPYRQ   |
| Zf | aA                | 1   | MDIAIQHPWFRRTLGL--YPTRLFDQFFGEGLEFDYDLFPFTTSTVSPYYRH |
| R  | aA <sup>ins</sup> | 1   | MDVTIQHPWFKRALGPFFYPSRLFDQFFGEGLEFYDLLPFLSSTISPYRQ   |
| H  | aA                | 51  | SLFRTVLDS---GISE-----VRSDRDKVFIF                     |
| Zf | aA                | 49  | SLFRNILDSSNSGVSE-----VRSDREKFTVY                     |
| R  | aA <sup>ins</sup> | 51  | SLFRTVLDS---GISELTMHWFVMHQPHAGNPKNNPGKVRSDRDKVFIF    |
| H  | aA                | 75  | LDVKHFSPEDLTVKVQDDFVEIHGKHNERQDDHGYISREFHRRYRLPSNV   |
| Zf | aA                | 76  | LDVKHFSPDELSVKVTDYVEIQGKHGERQDDHGYISREFHRRYRLPSNV    |
| R  | aA <sup>ins</sup> | 99  | LDVKHFSPEDLTVKVLDFVEIHGKHNERQDDHGYISREFHRRYRLPSNV    |
| H  | aA                | 125 | DQSALSCSLSADGMLTFCGPKIQTGLDATHAERAIPVSREEKPTSAPSS    |
| Zf | aA                | 126 | DQSAITCTLSADGLLTLCGPKT-SGIDAGRGDRTIPVTREDKSNSGSSS    |
| R  | aA <sup>ins</sup> | 149 | DQSALSCSLSADGMLTFSGPKVQSGLDAGHSERAI PVSREEKPSAPSS    |
|    |                   |     |                                                      |
| H  | aB                | 1   | MDIAIHHPWIRRRPFFPFHSPSRLFDQFFGEHLLESDFPTSTSLSPFYLR   |
| Zf | aBa               | 1   | MEISIQHPWYRRPLFPGFEPYRIFDQYFGEHLSDSD--PFSFPYTMFYR    |
| Zf | aBb               | 1   | MDIAINPP-FRRILFPIFFPRRQ----FGEHITEAD-----VISLSYSQ    |
| H  | aB                | 51  | PPSFLRAPSWFDTGLSEMRLEKDRFSVNLVDVKHFSPEELKVKVLGDVIEV  |
| Zf | aBa               | 49  | -PYLWRFPSSWWDSGMSEMRQDRDRFVINLVDVKHFSPELTVKVNEDFIEI  |
| Zf | aBb               | 40  | RSSFLRSPSWMESGVSEVKMEKQFSLSLVDVKHFAPEELSVKIIIGDFIEI  |
| H  | aB                | 101 | HGKHEERQDEHGFI SREFHRKYRIPADVDPLTITSSLSSDGVLTVNGPRK  |
| Zf | aBa               | 99  | HGKHDERQDDHGIVAREFFRKYKIPAGVDPGAI TSSLSSDGVLTINTLRH  |
| Zf | aBb               | 91  | HAKHEDRQDGHGFVSREFLRKYRVPVGVDPASITSSLSSDGVLTVTGPLK   |
| H  | aB                | 151 | QVSGPER--TIPITREEKPAVTAAPKK                          |
| Zf | aBa               | 149 | QLDILER--SIPIICGEKPPA----QK                          |
| Zf | aBb               | 141 | LSDGPERTIAIPVTRDDKTTV-AGPQK                          |

**Figure S1.** Sequence alignments of  $\alpha$ A and  $\alpha$ B crystallins. Multiple sequence alignments were performed with ClustalW and minor manual adjustment using sequence from the NCBI protein database. Top: human  $\alpha$ A (AAB33370.1), zebrafish  $\alpha$ A (AAK61363.1) and rat  $\alpha$ A<sup>ins</sup> (NP\_001276666.1). Bottom: human  $\alpha$ B (ACP18852.1), zebrafish  $\alpha$ Ba (NP\_571232.1) and zebrafish  $\alpha$ Bb (NP\_001002670.1). Highlighted red residues indicate consensus sites of phosphorylation in the human  $\alpha$ -crystallins. The gray shaded region outlines the approximate boundaries for the  $\alpha$ -crystallin domain derived from de Jong and colleagues<sup>7</sup>.

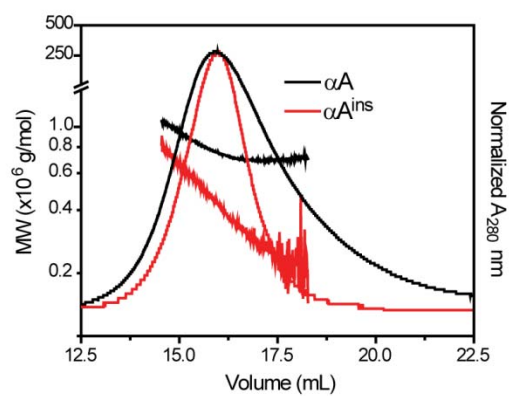

**Figure S2.** MALS analysis of  $\alpha A$  and  $\alpha A^{\text{ins}}$ . Rat  $\alpha A^{\text{ins}}$  forms smaller oligomers on average than  $\alpha A$ , and is more polydisperse as suggested by the steep slope of molecular weights sampled across the elution peak. The analysis was performed as described in Experimental Procedures.
